# Supplementary material for: Single-Cell Electroporation with Real-Time Impedance Assessment Using a Constriction Microchannel
Source: Micromachines (Basel). 2020 Sep 16;11(9):856. doi: 10.3390/mi11090856 (PMC7570009; doi:10.3390/mi11090856)
Supplement: Supplementary file 1 [file micromachines-11-00856-s001.pdf]

# Supplementary Materials: Single-cell Electroporation with Real-time Impedance Assessment USING a Constriction Microchannel

Yifei Ye <sup>1,2</sup>, Xiaofeng Luan <sup>1,2</sup>, Lingqian Zhang <sup>1</sup>, Wenjie Zhao <sup>1,2</sup>, Jie Cheng <sup>1,2</sup>, Mingxiao Li <sup>1</sup>, Yang Zhao <sup>1,\*</sup> and Chengjun Huang <sup>1,2,\*</sup>

<sup>1</sup> R&D Center of Healthcare Electronics, Institute of Microelectronics, Chinese Academy of Sciences, Beijing, 100029, China; yeyifei@ime.ac.cn (Y.Y.); luanxiaofeng@ime.ac.cn (X.L.); zhanglingqian@ime.ac.cn (L.Z.); zhaowenjie@ime.ac.cn (W.Z.); chengjie@ime.ac.cn (J.C.); limingxiao@ime.ac.cn (M.L.)

<sup>2</sup> School of Future Technology, University of Chinese Academy of Sciences, Beijing, 100049, China

\* Correspondence: zhaoyang@ime.ac.cn (Y.Z.); huangchengjun@ime.ac.cn (C.H.); Tel.: +86-010-8299-5600 (Y.Z.); +86-010-8299-5743 (C.H.)

Received: 17 August 2020; Accepted: date; Published: date

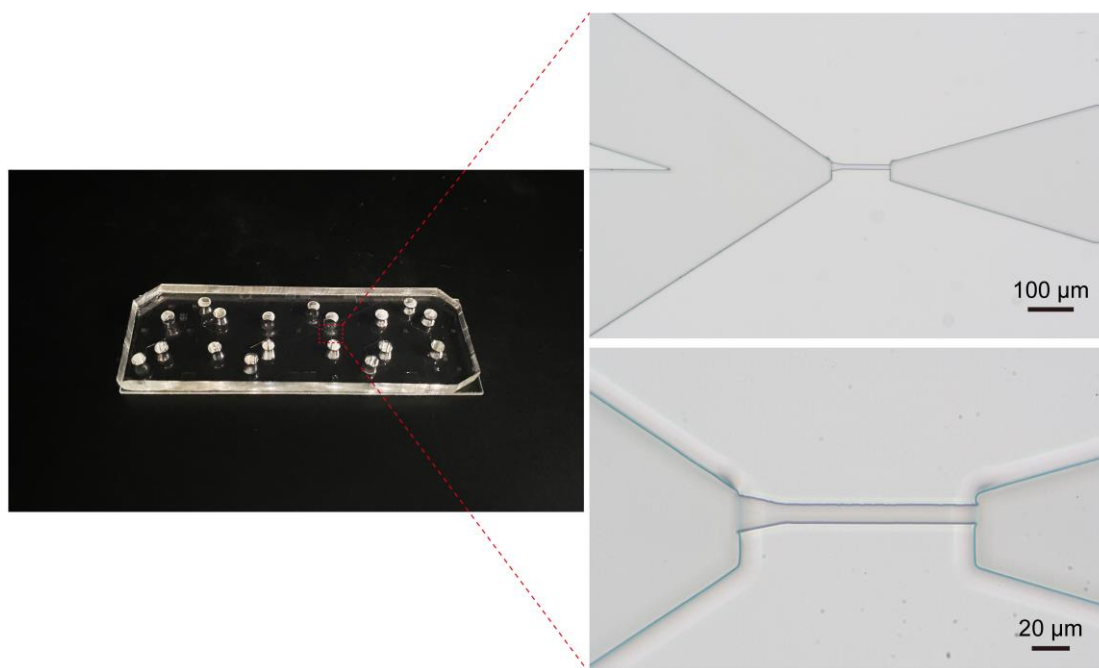

**Figure S1.** Photograph of the microfluidic chip and the micrographs of the loading channel, bypass channel, constriction channel and release channel.

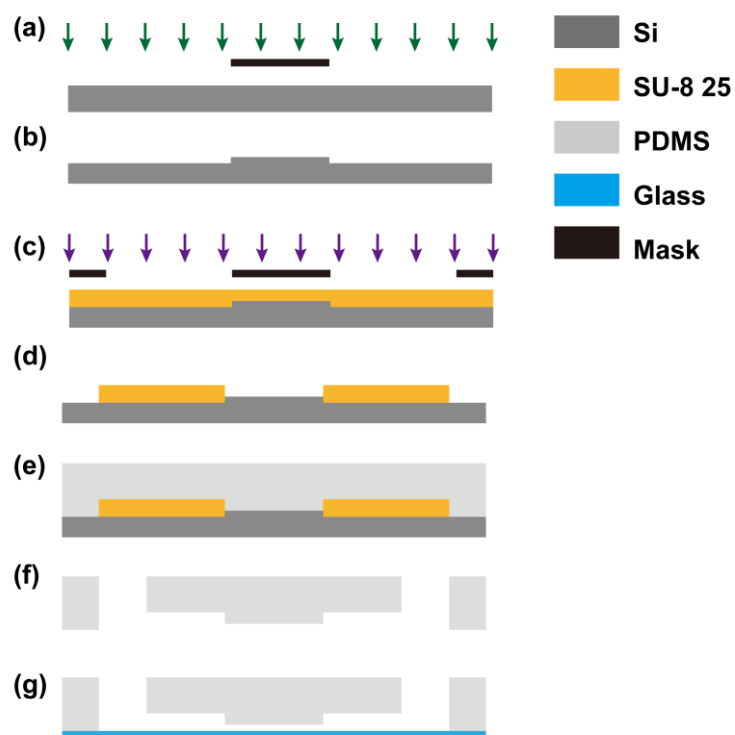

**Figure S2.** The microfluidic device was fabricated based on the key steps of (a,b) deep etch of Si, (c) SU-8 25 spin coating, exposure with alignment, (d) development, (e) PDMS molding and (f) peeled PDMS with holes punched. After plasma treatment, the PDMS layer and the glass substrate were bonded together (g).
